# Supplementary material for: Coexistence of Pseudomonas aeruginosa With Candida albicans Enhances Biofilm Thickness Through Alginate-Related Extracellular Matrix but Is Attenuated by N-acetyl-l-cysteine
Source: PubMed Central journal article supplement (PMC7732535; doi:10.3389/fcimb.2020.594336), 2020-11-24
Supplement: DataSheet_1.pdf [file DataSheet_1.pdf]

**Supplementary Table 1.** List of Primers are demonstrated.

| <b>Primer names</b>              | <b>genes</b>                    | <b>Forward</b>                  | <b>Reverse</b>                 |
|----------------------------------|---------------------------------|---------------------------------|--------------------------------|
| Arginase-1                       | <i>Arg-1</i>                    | 5'-CTTGGCTTGCTTCGGA ACTC-3'     | 5'-GGAGAAGGCGTTTGCTTAGTTC-3'   |
| Inducible nitric oxide synthase  | <i>iNOS</i>                     | 5'-ACCCACATCTGGCAGAATGAG-3'     | 5'-AGCCATGACCTTTCGCATTAG-3'    |
| Interleukin-1 $\beta$            | <i>IL-1<math>\beta</math></i>   | 5'-GAAATGCCACCTTTTGACAGTG-3'    | 5'-TGGATGCTCTCATCAGGACAG-3'    |
| Tumor necrosis factor- $\alpha$  | <i>TNF-<math>\alpha</math></i>  | 5'-CCTCACACTCAGATCATCTTCTC-3'   | 5'-AGATCCATGCCGTTGGCCAG-3'     |
| Resistin-like molecule- $\alpha$ | <i>FIZZ-1</i>                   | 5'-GCCAGGTCCTGGAACCTTTC-3'      | 5'-GGAGCAGGGAGATGCAGATGAG-3'   |
| Transforming growth factor       | <i>TGF-<math>\beta</math></i>   | 5'-CAGAGCTGCGCTTGCAGAG-3'       | 5'-GTCAGCAGCCGGTTACCAAG-3'     |
| $\beta$ -actin                   | <i><math>\beta</math>-actin</i> | 5'-CGGTTCCGATGCCCTGAGGCTCTT-3'  | 5'-CGTCACACTTCATGATGGAATTGA-3' |
| Anti-sigma factor MucA           | <i>mucA</i>                     | 5'-GATCGCGACACCGAACTAAT-3'      | 5'-GATCGCGACACCGAACTAAT-3'     |
| Transcriptional regulator CysB   | <i>cysB</i>                     | 5'-ATGAAGCTTCAGCAATTGCGCTATA-3' | 5'-TCAGTAGACCGGCAGTTCGATGCC-3' |
| Protein pslA                     | <i>psl</i>                      | 5'-ATGAACGCTCTGTTCGATTGTCCAC-3' | 5'-TCAAGCACTTGCACAGCAGACCT-3'  |
| Transcriptional regulator LasR   | <i>lasR</i>                     | 5'-GTAGTTGCCGACGATGAAG-3'       | 5'-GTAGTTGCCGACGATGAAG-3'      |
| 16S ribosomal RNA                | <i>16S rRNA</i>                 | 5'-ACGCAACTGACGAGTGTGAC-3'      | 5'-GATCGCGACACCGAACTAAT-3'     |
